# Supplementary material for: Development of highly efficient bimetallic metal organic frameworks for the extraction of Pd(ii) from aqueous solutions
Source: Royal Society of Chemistry journal article supplement (doi:10.1039/d3nj03977c), 2024-01-01
Supplement: d3nj03977c1.pdf [file d3nj03977c1.pdf]

## Development of Highly Efficient Bimetallic Metal Organic Frameworks for the Extraction of Pd(II) from Aqueous Solutions

*Somnath Sengupta,<sup>1</sup> S.B. Shrikala,<sup>2</sup> Nitin Gumber,<sup>3</sup> A. Suneesh,<sup>1</sup> B. Sreenivasulu,<sup>1,4\*</sup> C. V. S. Brahmananda Rao,<sup>1,4</sup>*

<sup>1</sup> Material Chemistry and Metal Fuel Cycle Group, Indira Gandhi Centre for Atomic Research, Kalpakkam– 603 102, Tamil Nadu, India.

<sup>2</sup> Amrita Vishwa Vidyapeetham, Coimbatore, Tamil Nadu, India.

<sup>3</sup> Fuel Chemistry Division, Bhabha Atomic Research Centre, Mumbai-400085, India

<sup>4</sup> Homi Bhabha National Institute, Indira Gandhi Centre for Atomic Research, Kalpakkam – 603 102, Tamil Nadu, India.

---

Corresponding author:

Dr. B. Sreenivasulu,  
Fuel Chemistry Division,  
Materials Chemistry and Metal Fuel Cycle Group,  
Indira Gandhi Centre for Atomic Research,  
Kalpakkam – 603102,  
Tamil Nadu, India.  
Tel. +91 44 27480055 – 24287  
Email: [bsrinu@igcar.gov.in](mailto:bsrinu@igcar.gov.in)

### **Determination of Pd(II) concentration using UV-vis spectroscopy**

The colorimetric determination of Pd(II) was done using Thorin indicator as chromogenic agent, which tends to form 1:1 violet complex with divalent palladium which shows  $\lambda_{\max}$  around 540 nm. 1 mL of 0.05 % (w/V) thorin indicator was used for the studies. pH of the solution to be analyzed was maintained at 3.7 using sodium acetate-acetic acid buffer. A series of solutions ranging from 1 ppm to 10 ppm was prepared from a standard Pd(II) stock solution of concentration 1 g/L. The calibration was done with these standard solutions which yielded a linear calibration plot. The value of molar extinction coefficient, obtained from the slope of calibration plot was found to be  $6598.04 \text{ L mol}^{-1} \text{ cm}^{-1}$ . Similar procedure for palladium(II) determination was reported in literature.<sup>1</sup>

### **PXRD**

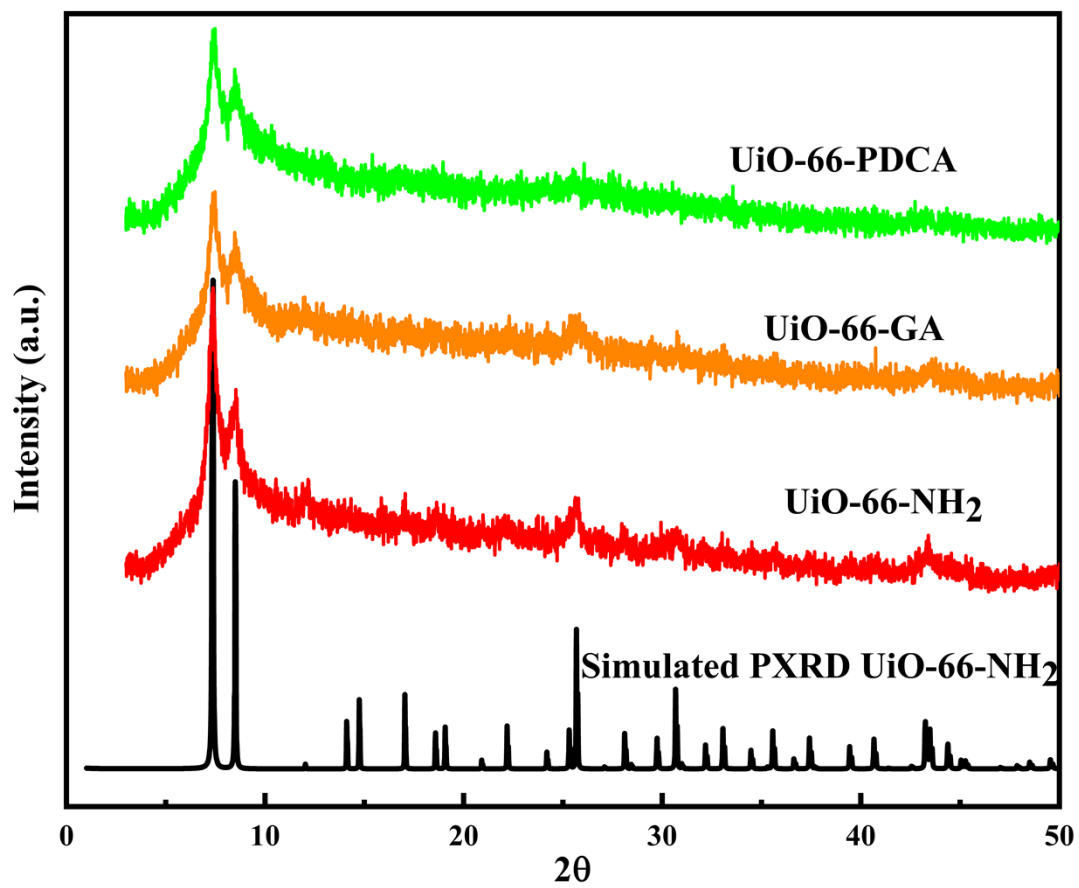

**Fig. S1** PXRD of UiO-66-NH<sub>2</sub>, UiO-66-GA and UiO-66-PDCA

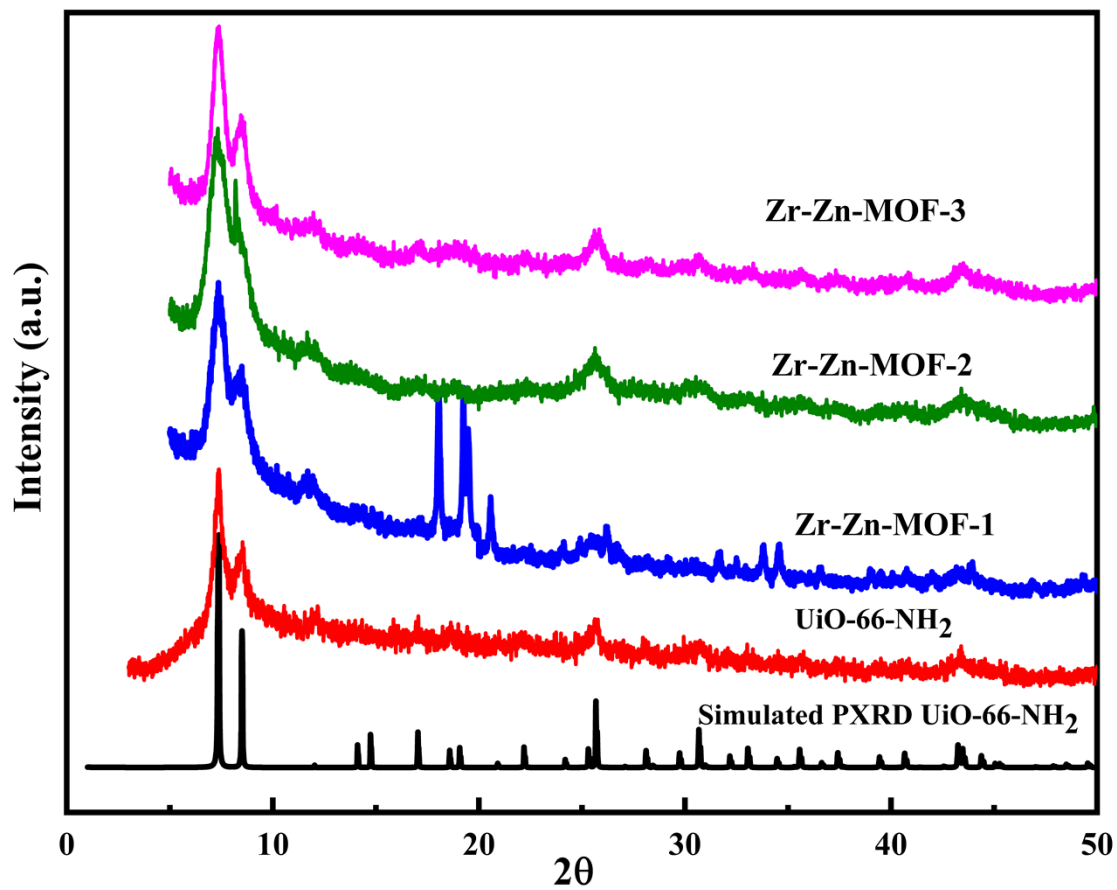

Fig. S2 PXRD of UiO-66-NH<sub>2</sub> and bimetallic MOFs

BET Surface Area Analysis

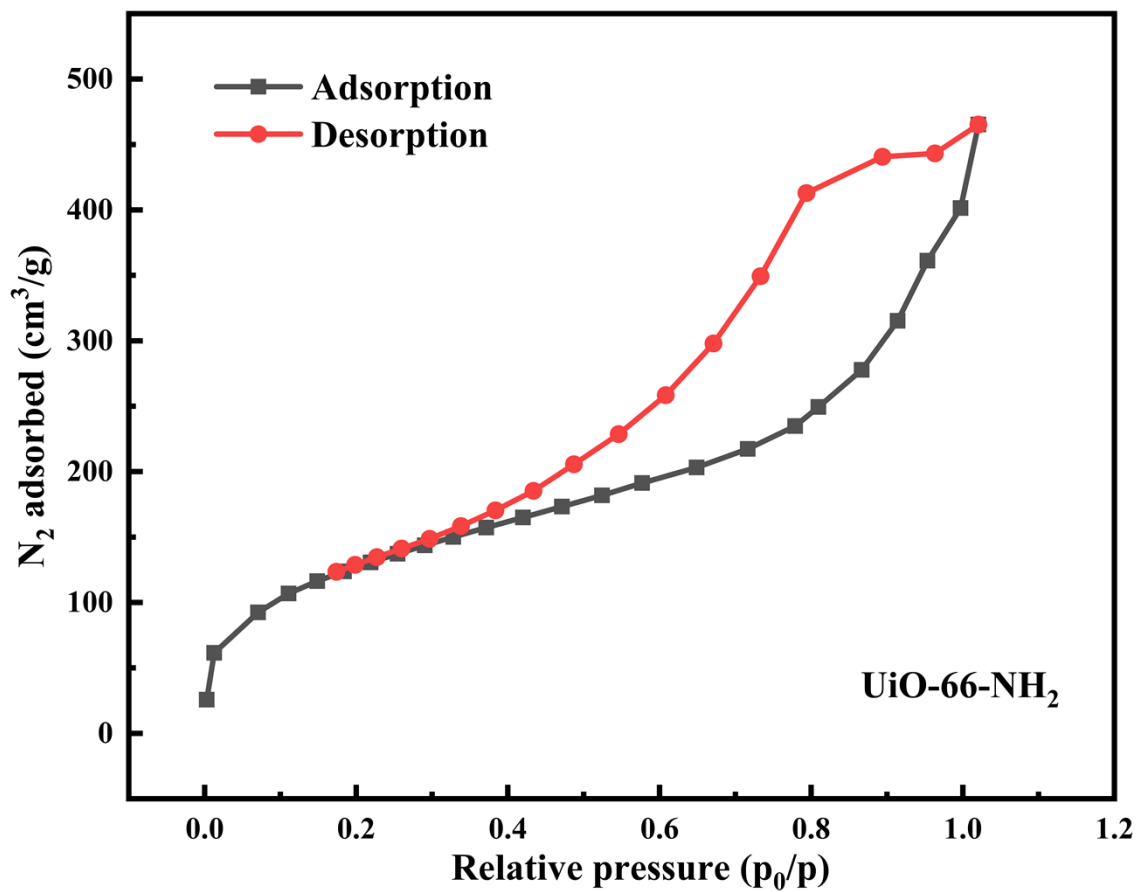

Fig. S3 N<sub>2</sub> adsorption-desorption isotherm at 77 K for UiO-66-NH<sub>2</sub>

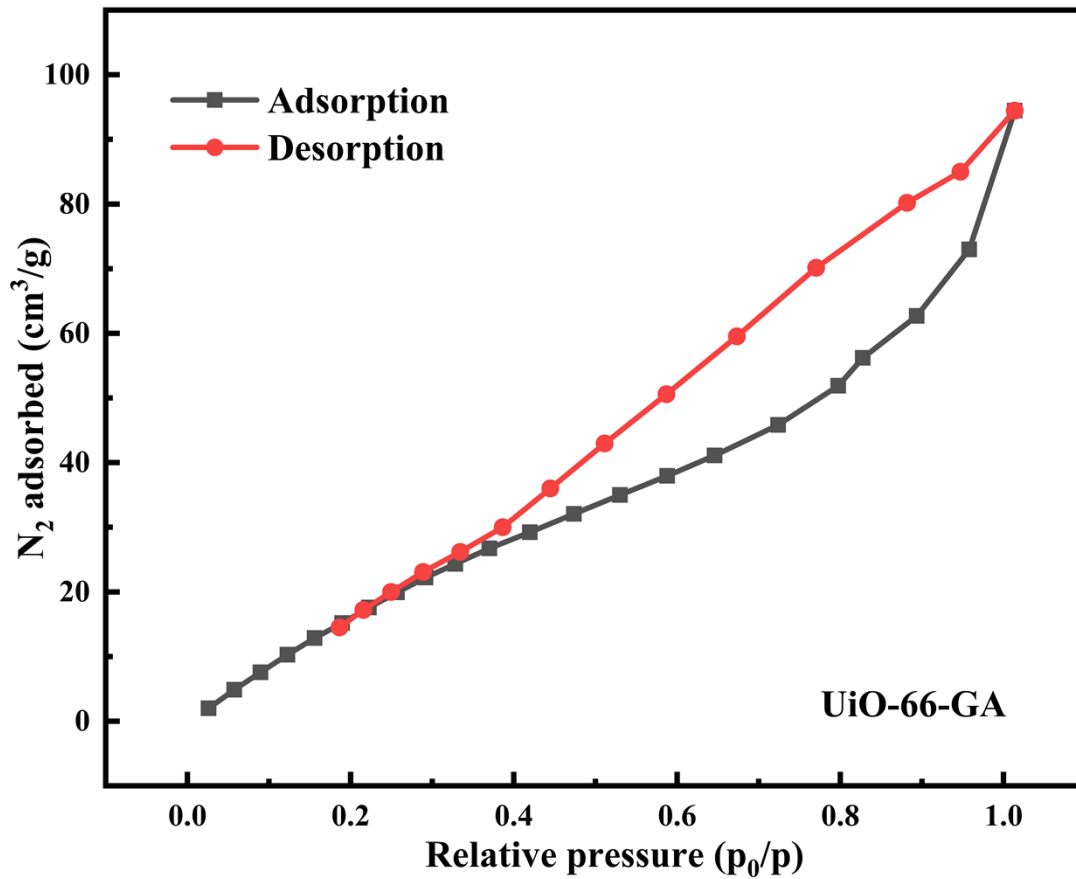

Fig. S4  $N_2$  adsorption-desorption isotherm at 77 K for UiO-66-GA

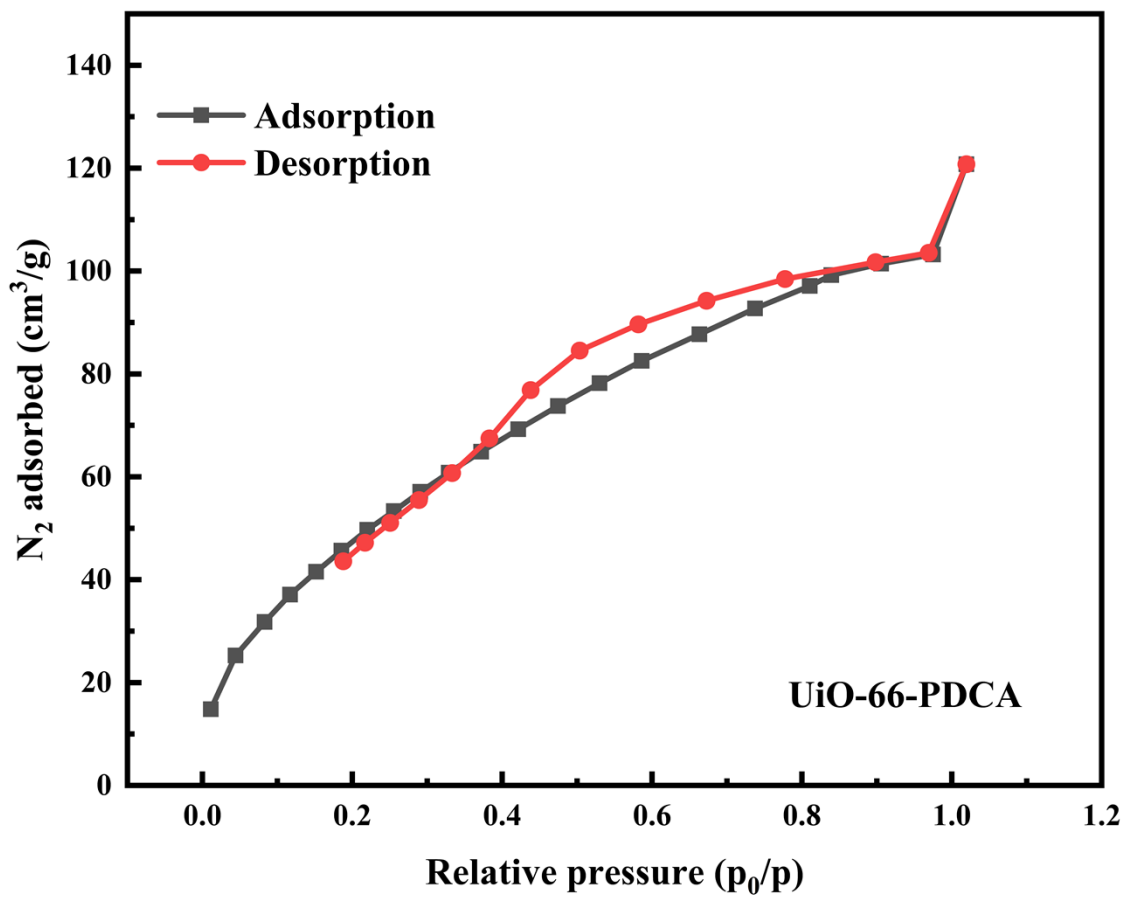

Fig. S5 N<sub>2</sub> adsorption-desorption isotherm at 77 K for UiO-66-PDCA

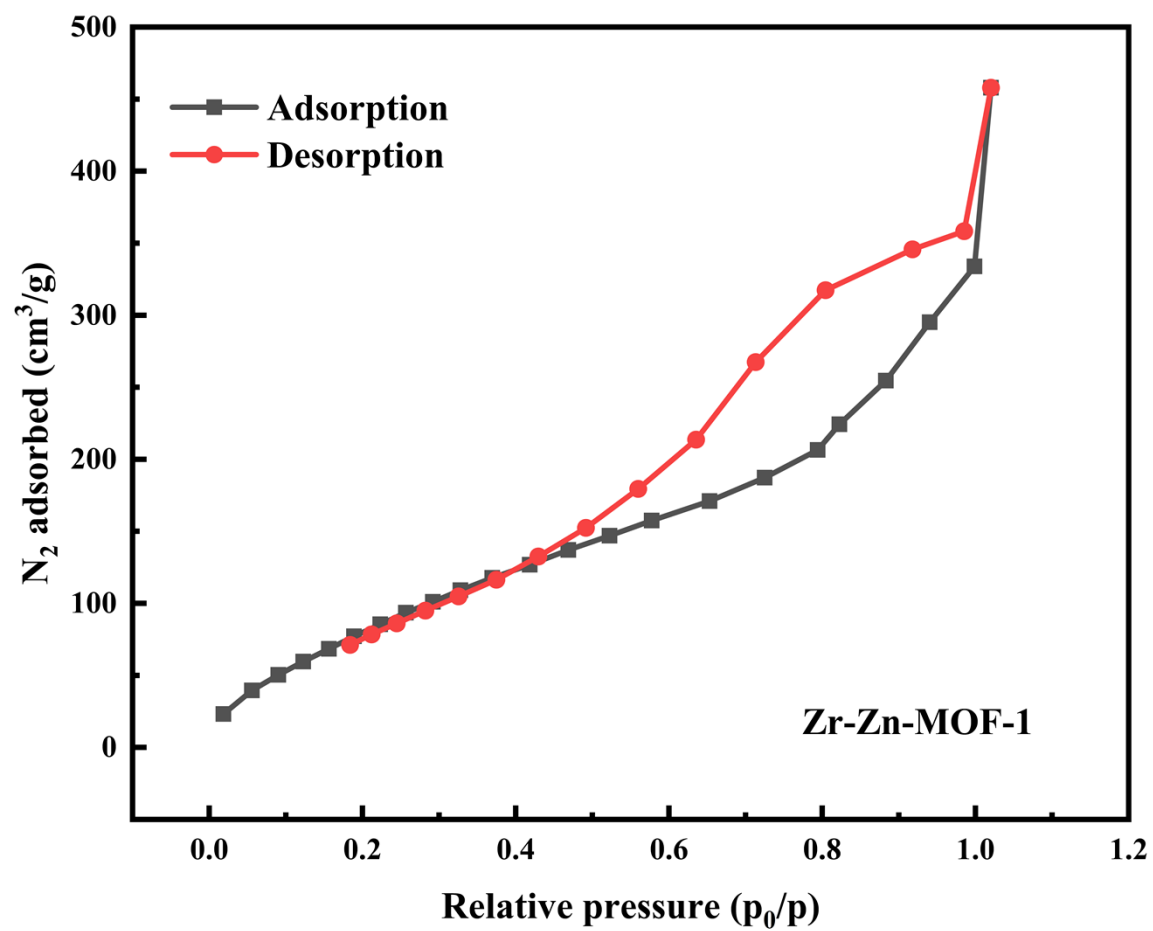

Fig. S6 N<sub>2</sub> adsorption-desorption isotherm at 77 K for Zr-Zn-MOF-1



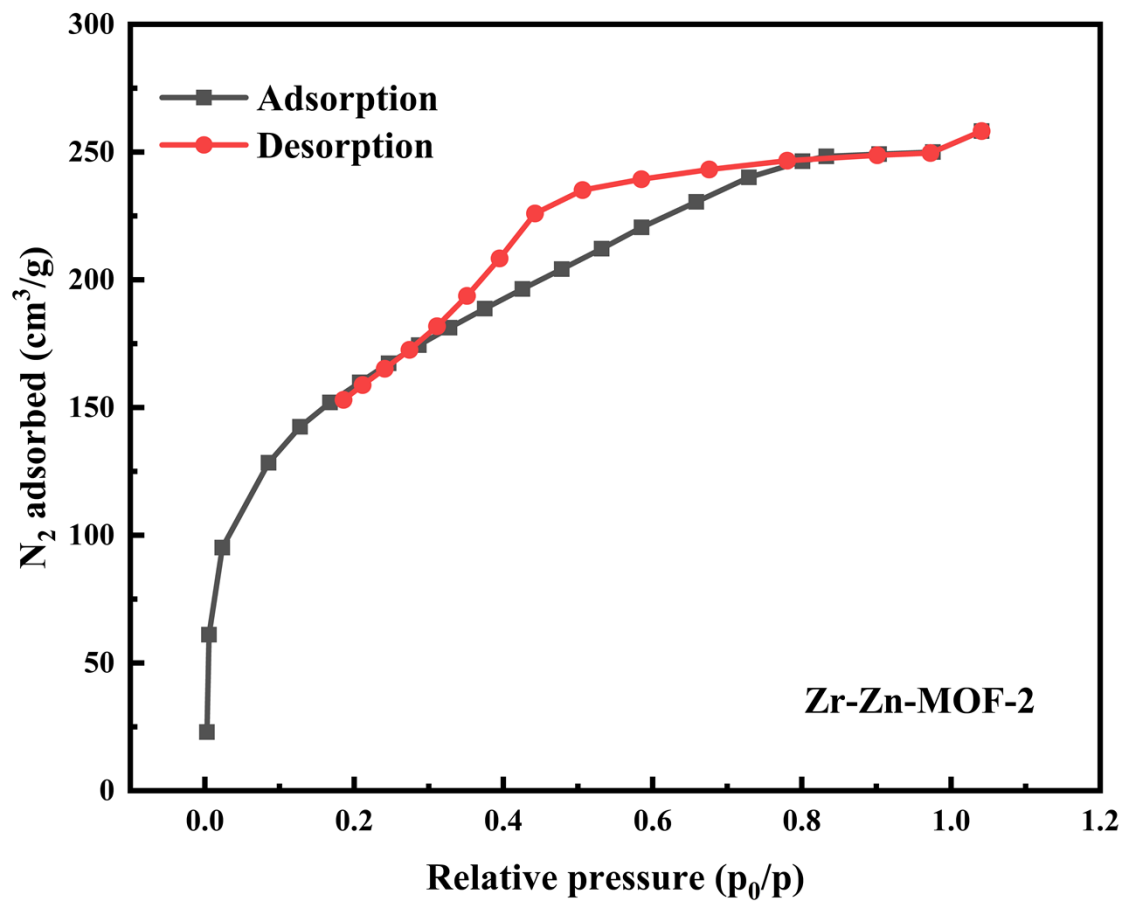

Fig. S7  $N_2$  adsorption-desorption isotherm at 77 K for Zr-Zn-MOF-2

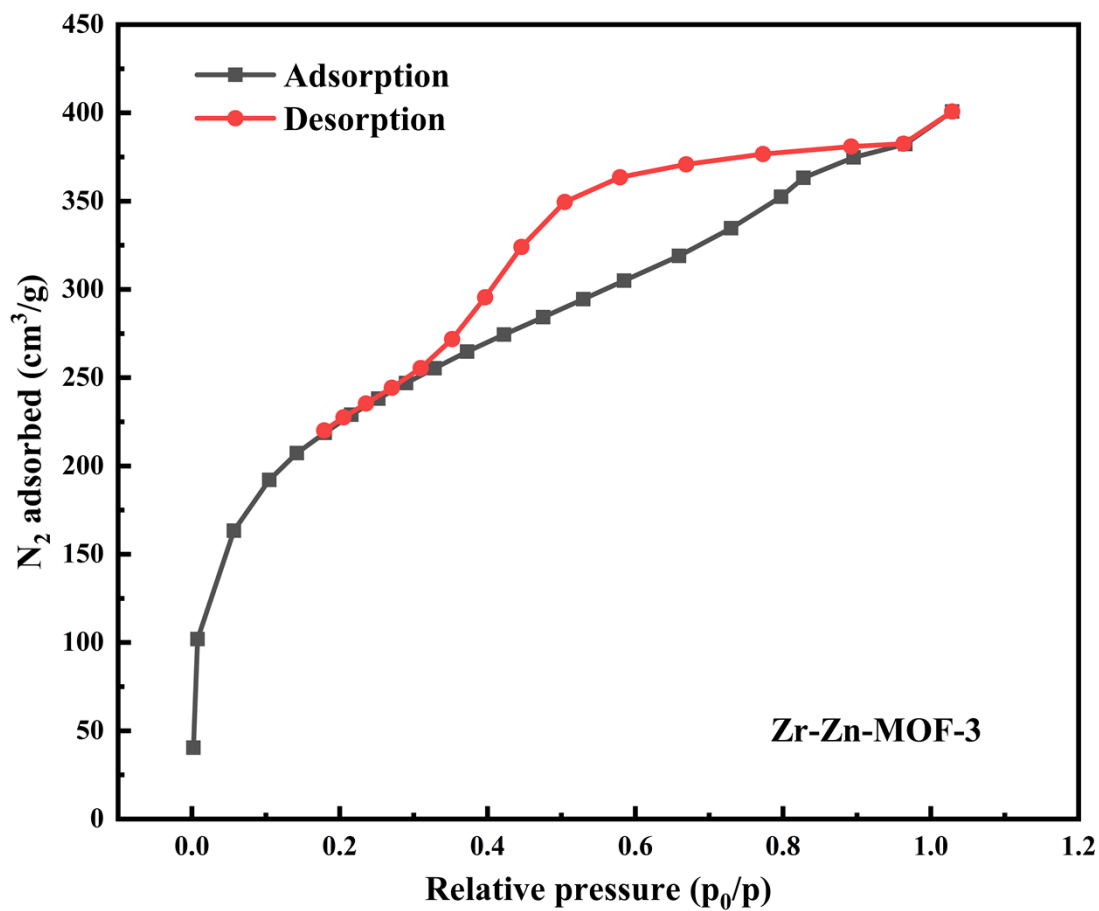

Fig. S8 N<sub>2</sub> adsorption-desorption isotherm at 77 K for Zr-Zn-MOF-3

### SEM-EDX Analysis

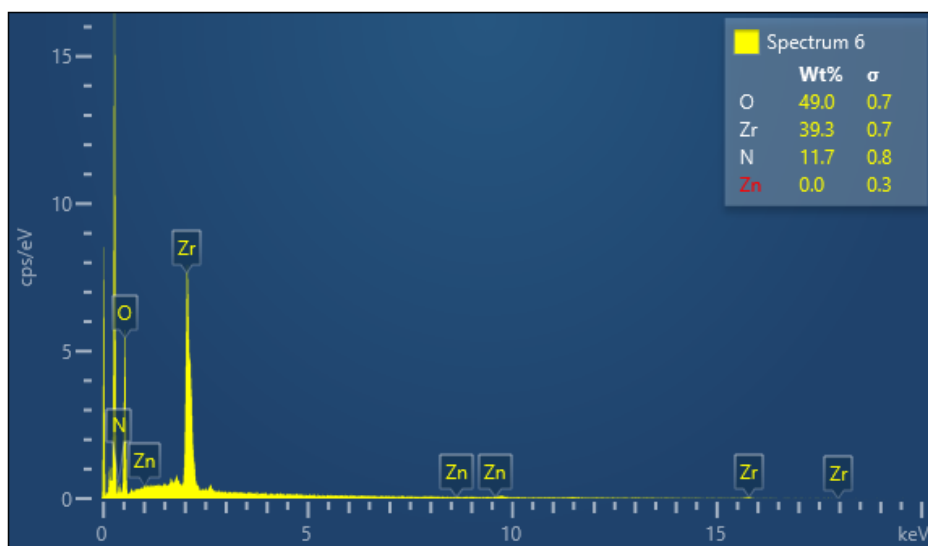

(a)

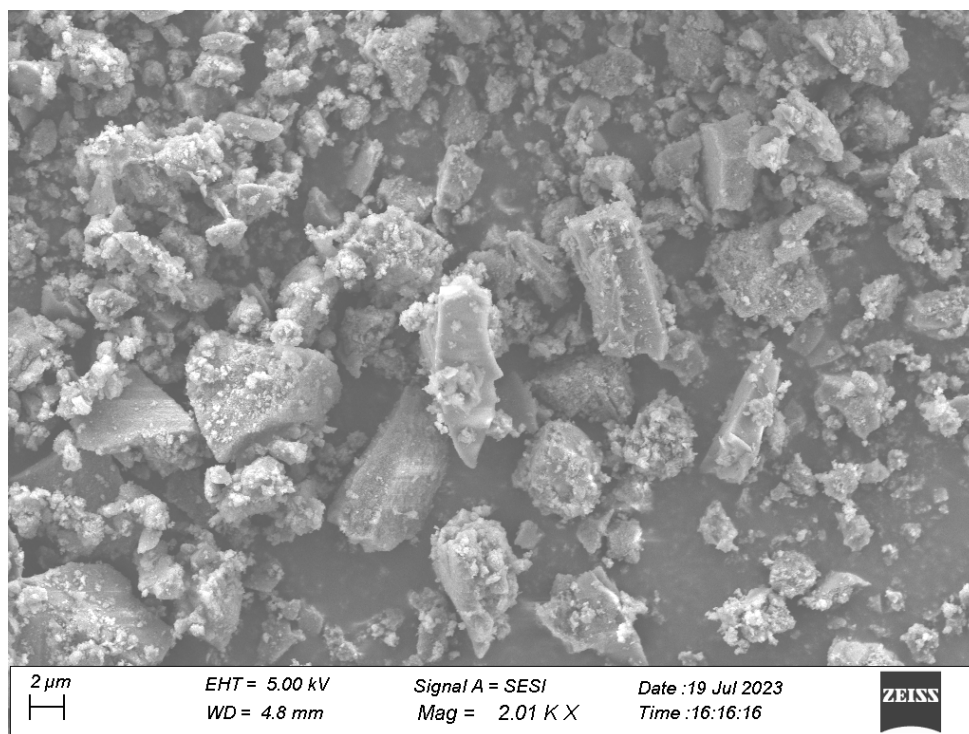

(b)

**Fig. S9**(a) EDX spectra and (b) SEM image of UiO-66-NH<sub>2</sub>.

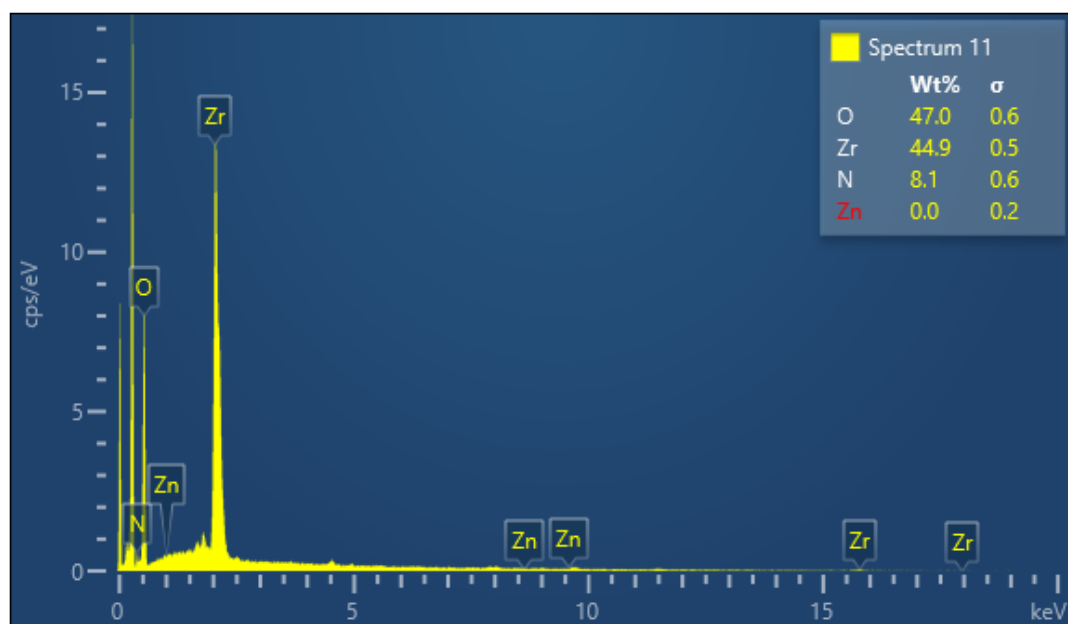

(a)

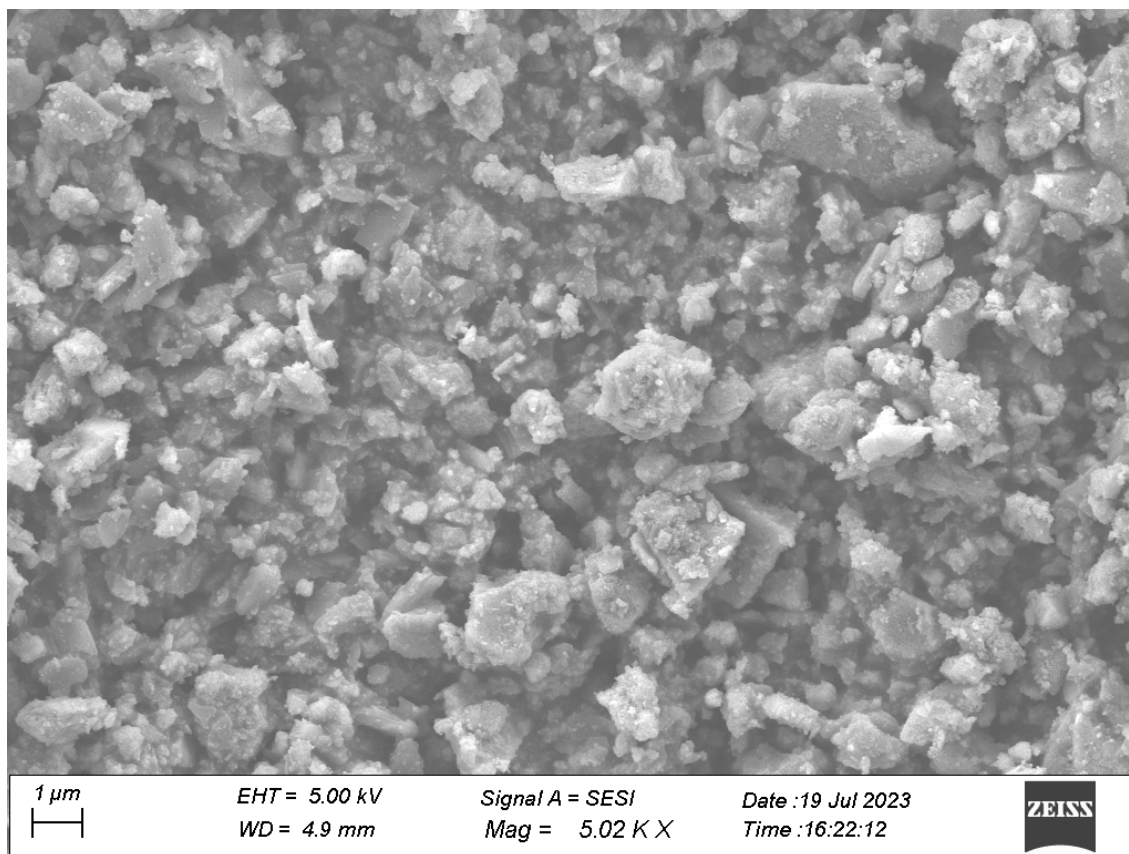

(b)

**Fig. S10(a)** EDX spectra and **(b)** SEM image of UiO-66-GA.

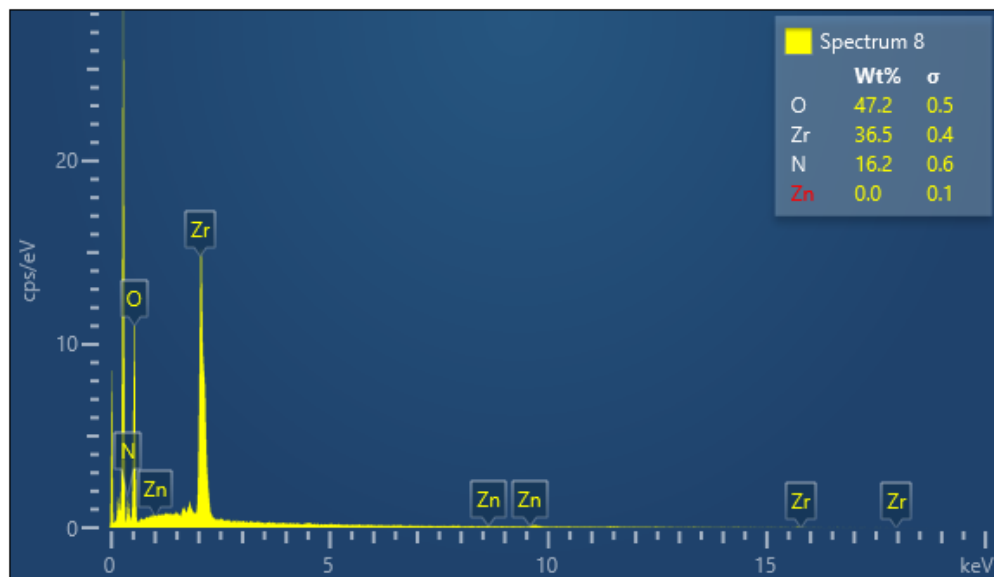

(a)

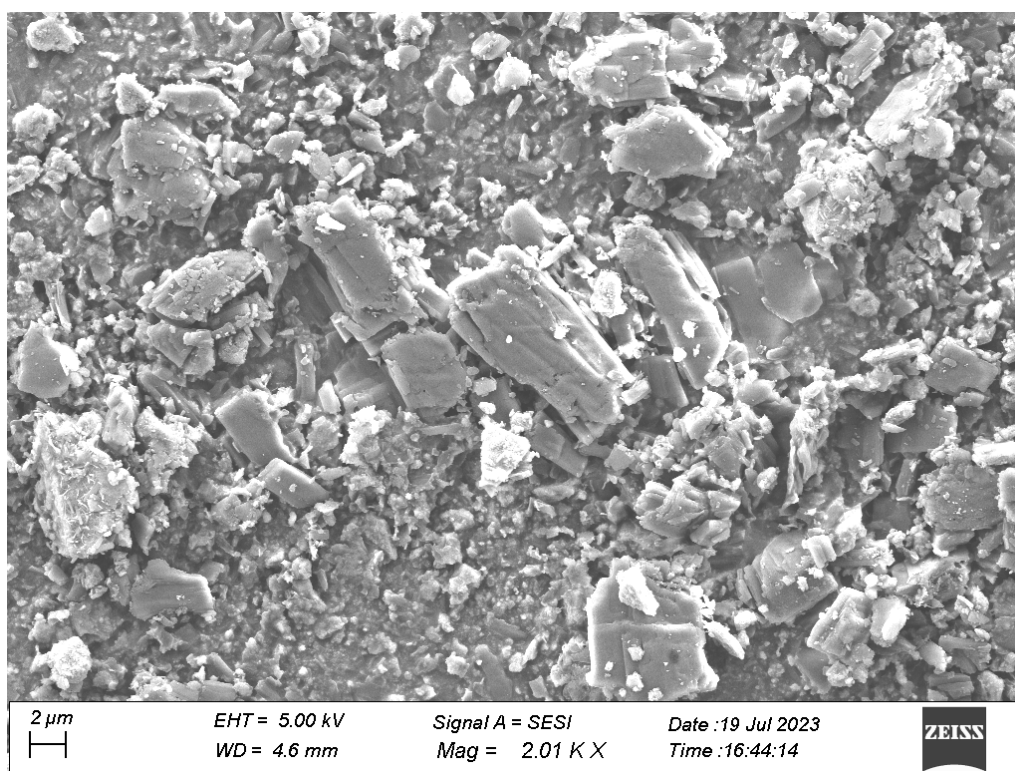

(b)

**Fig. S11(a)** EDX spectra and **(b)** SEM image of UiO-66-PDCA.

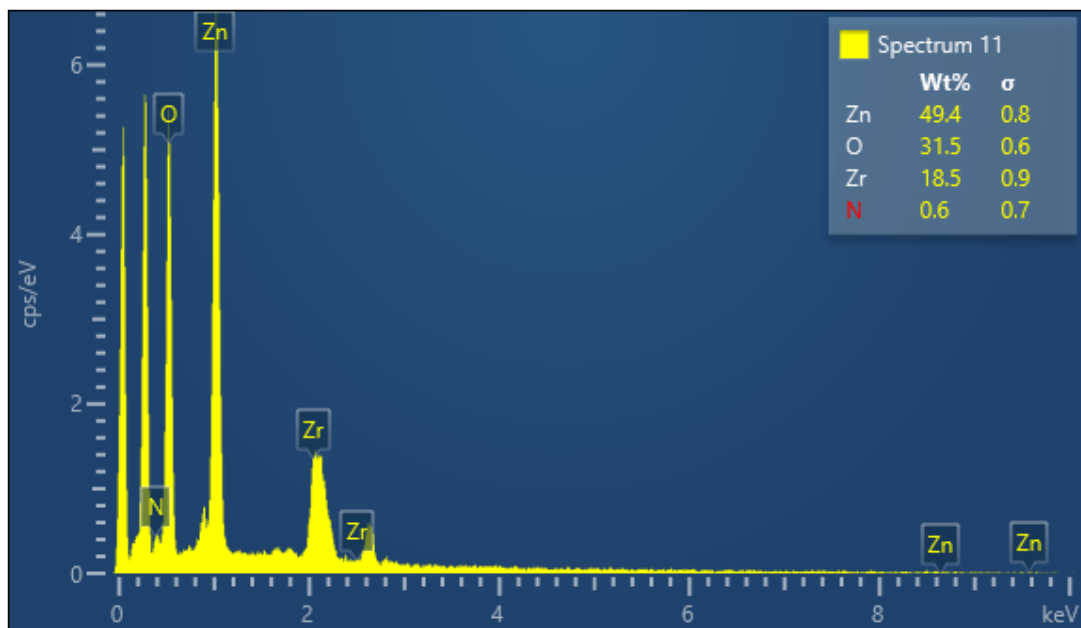

(a)

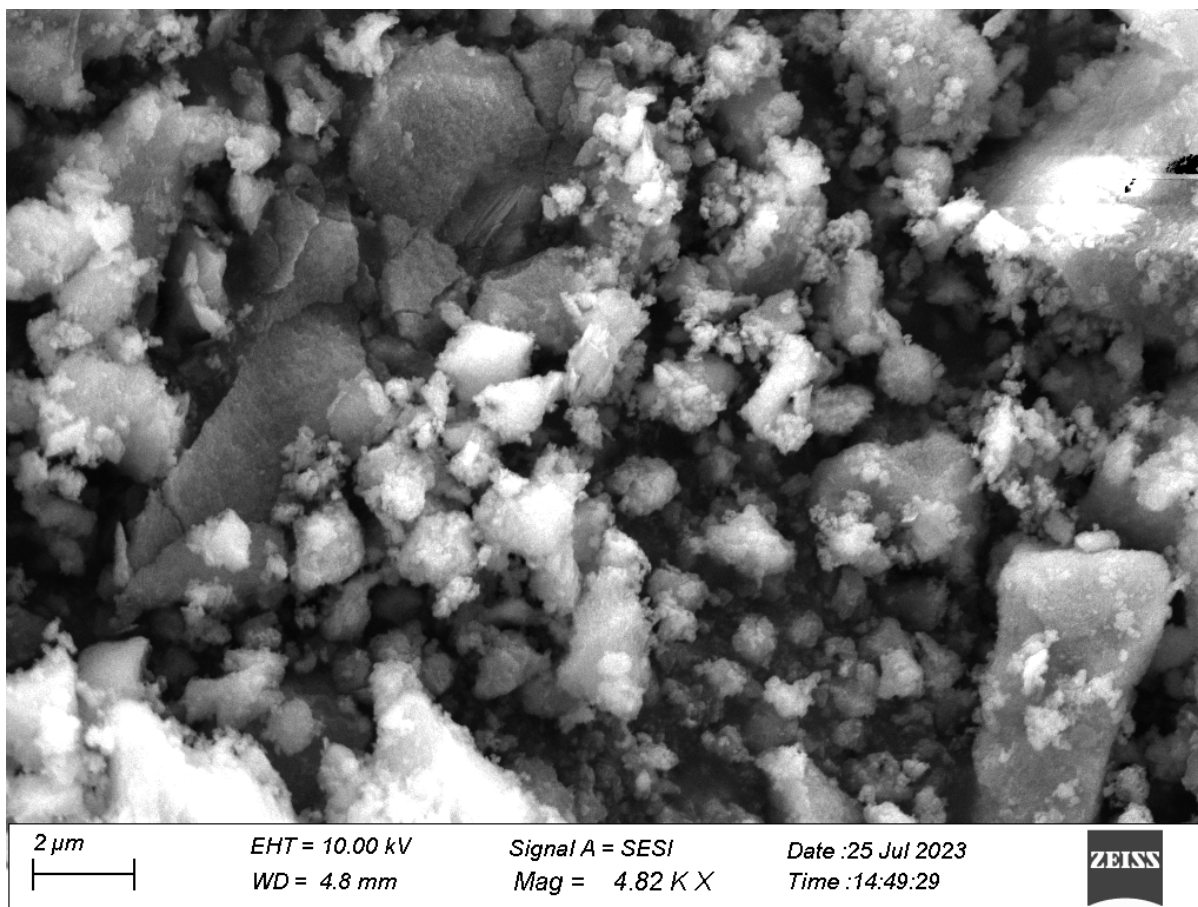

(b)

**Fig. S12**(a) EDX spectra and (b) SEM image of Zr-Zn-MOF-1.



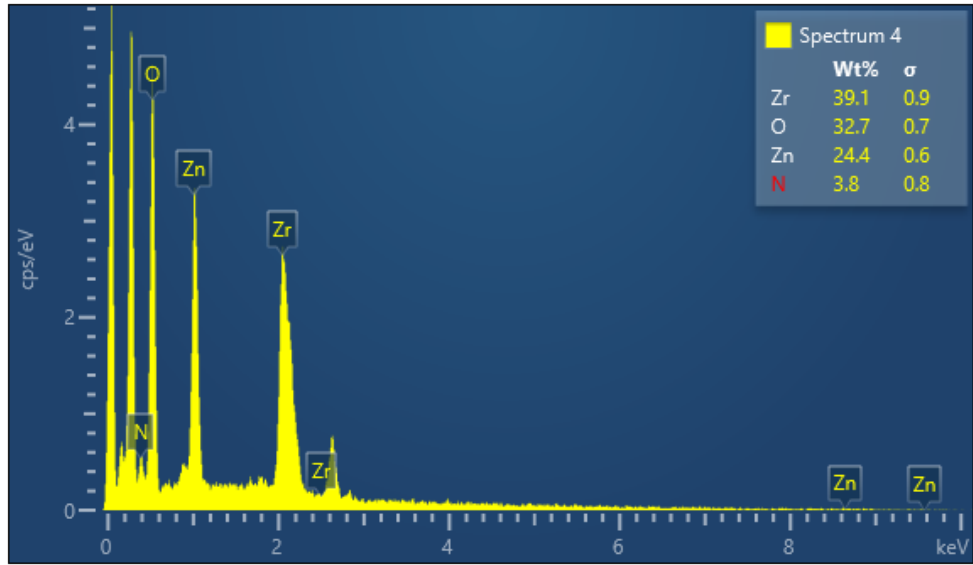

(a)

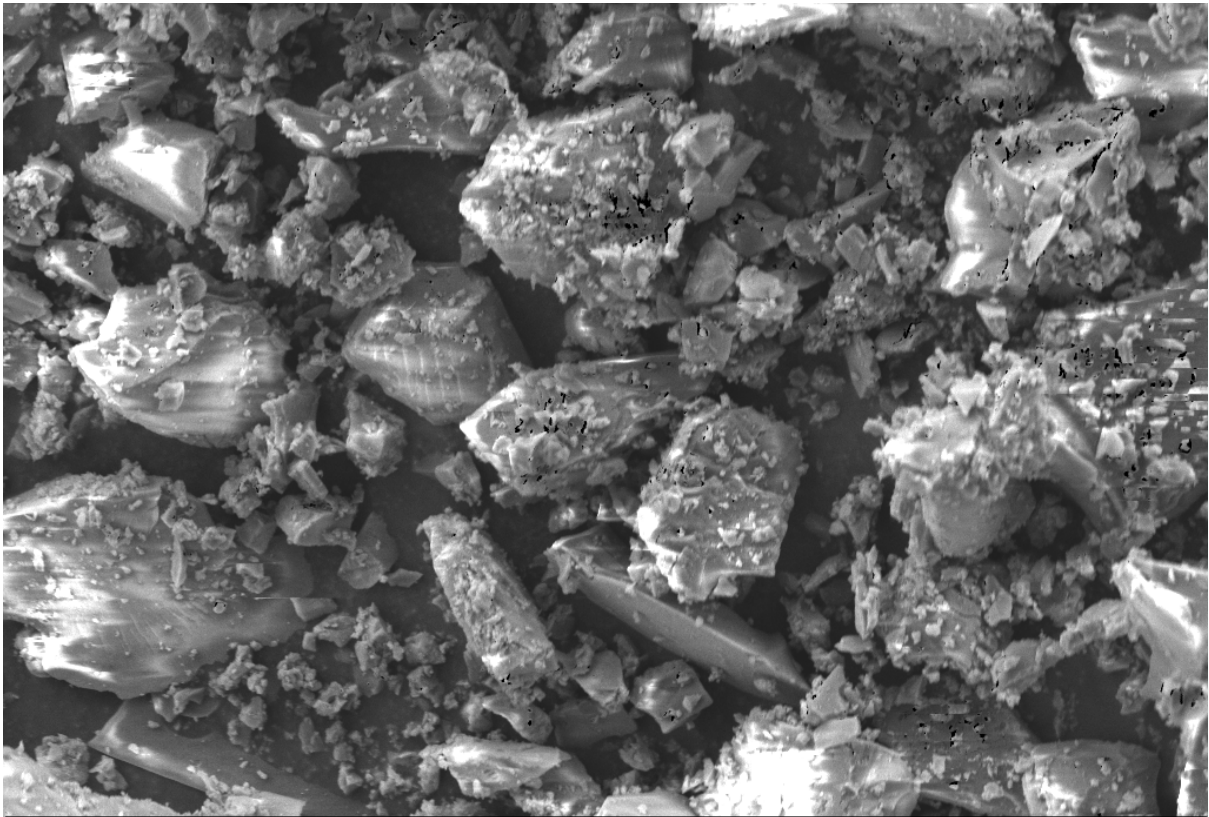

10  $\mu\text{m}$

EHT = 5.00 kV  
WD = 5.1 mm

Signal A = SESI  
Mag = 1.43 K X

Date :25 Jul 2023  
Time :15:36:14

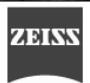

(b)

**Fig. S13(a)** EDX spectra and (b) SEM image of Zr-Zn-MOF-2.

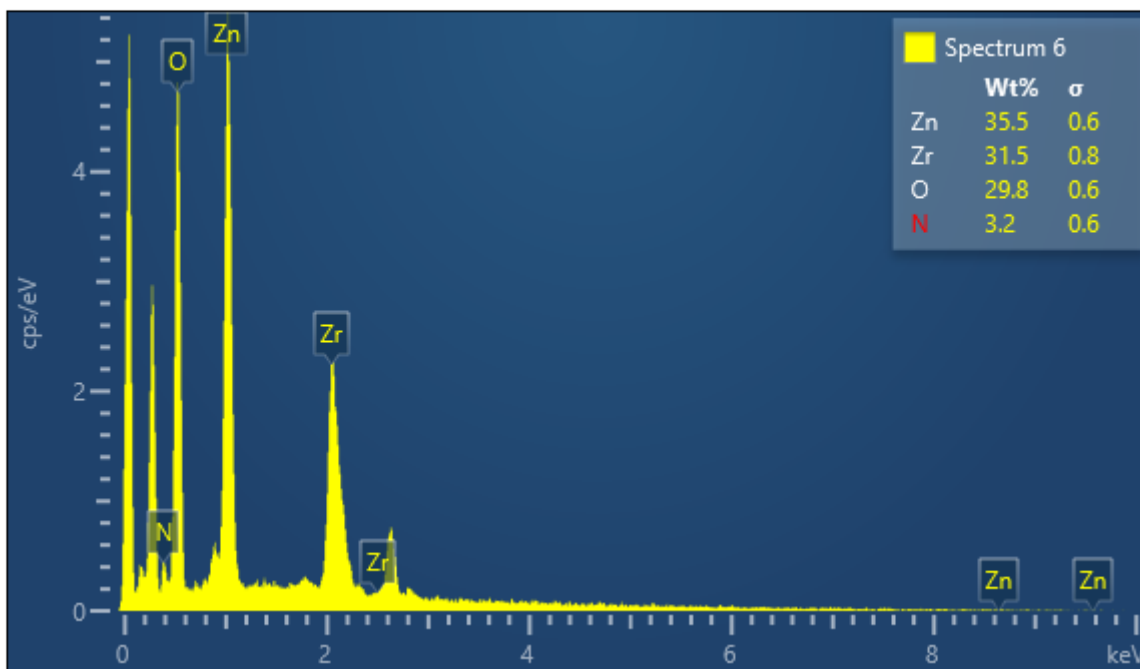

(a)



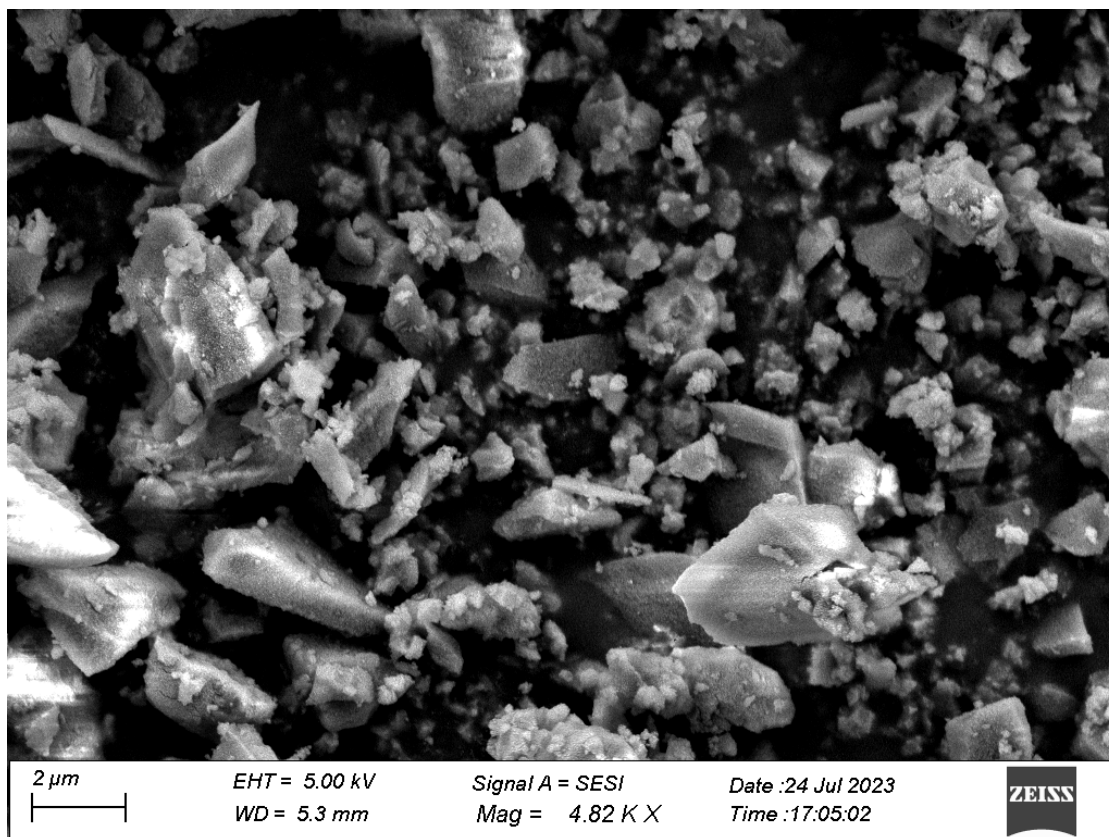

(b)

Fig. S14(a) EDX spectra and (b) SEM image of Zr-Zn-MOF-3.

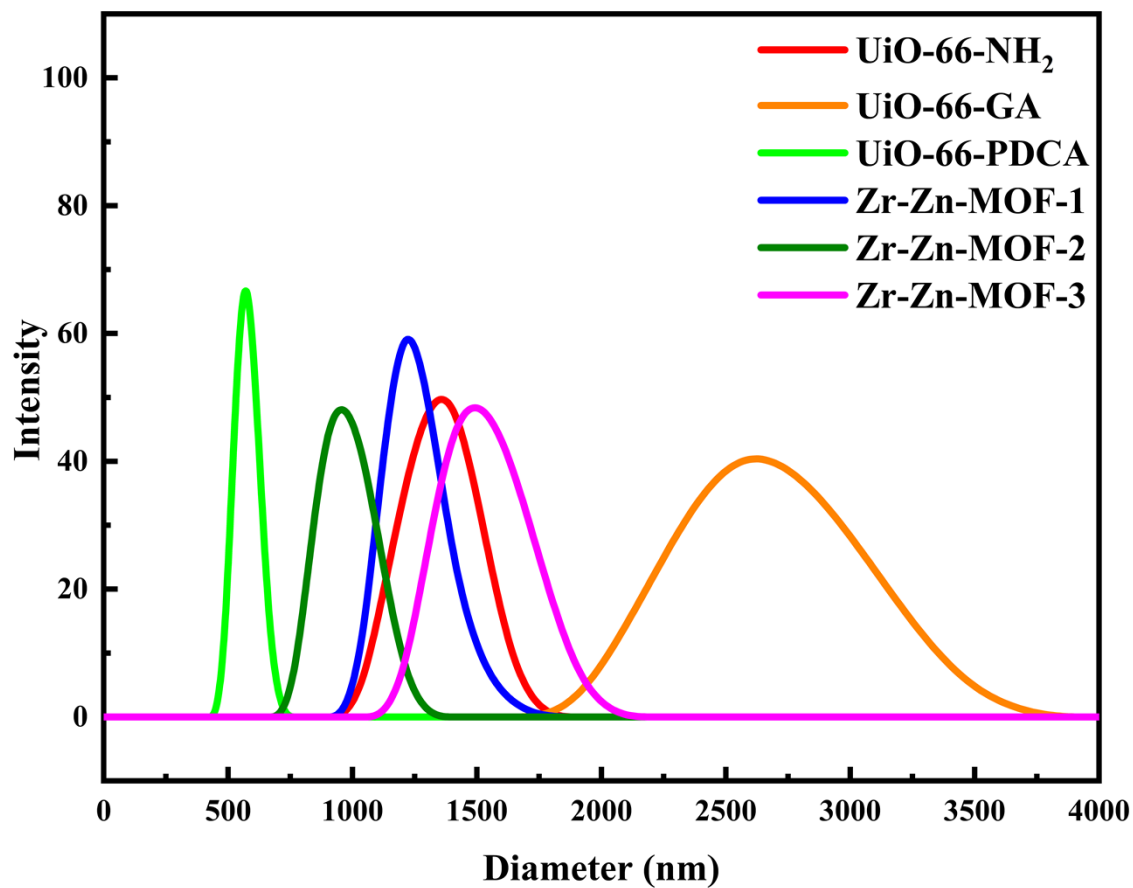

**Fig. S15** Dynamic light scattering (DLS) particle size distributions for the MOF samples dispersed in aqueous solution.

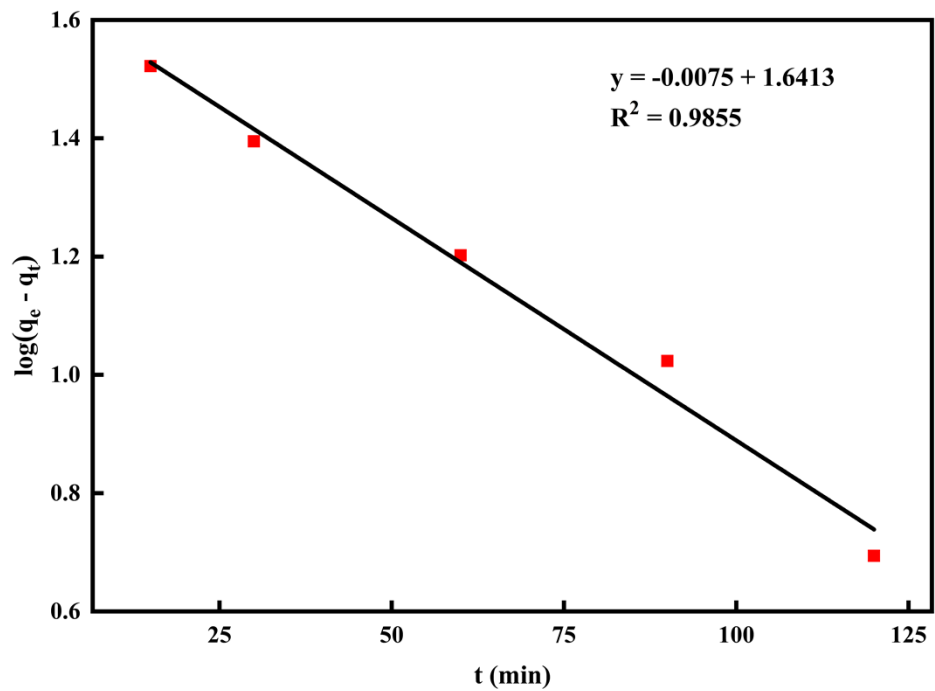

(a)

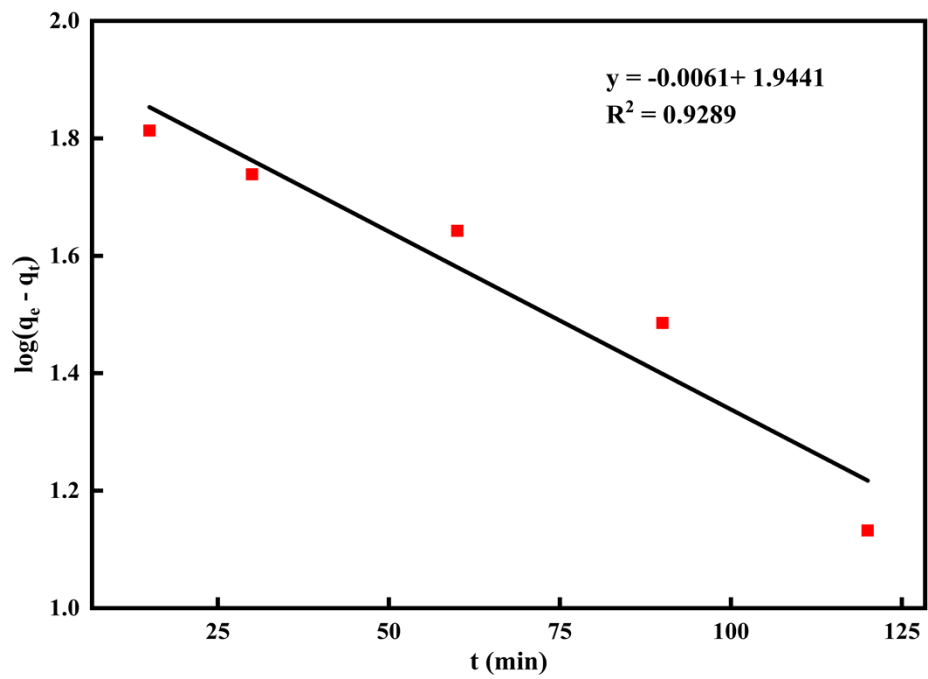

(b)

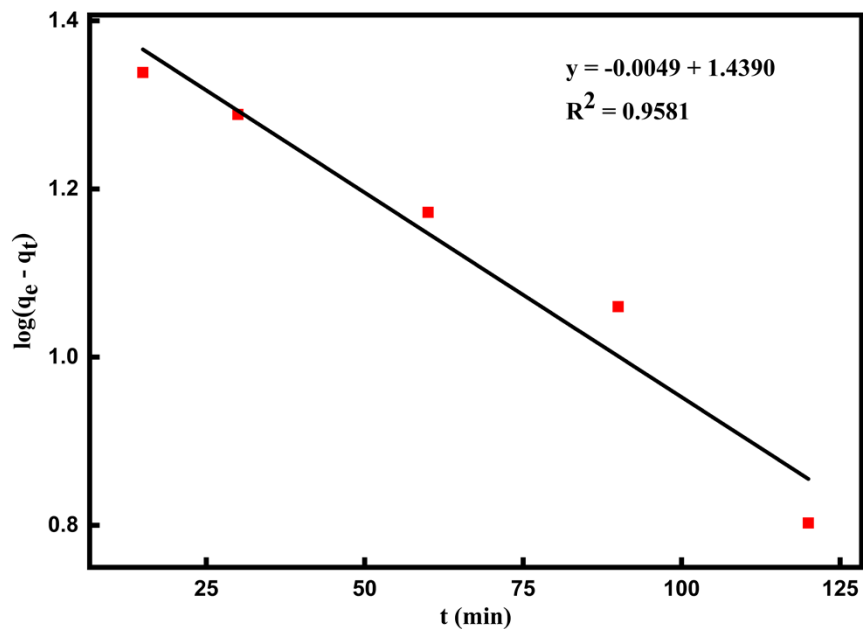

(c)

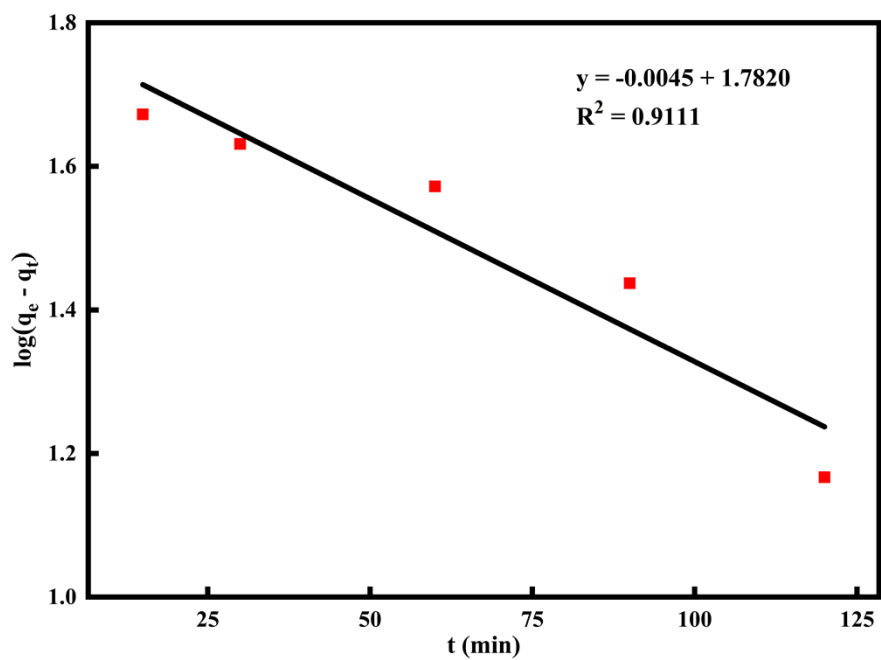

(d)

**Fig. S16** Linear plots for pseudo-first order kinetics for the adsorption of palladium(II) on different MOFs (a) UiO-66-NH<sub>2</sub> (b) Zr-Zn-MOF-1 (c) Zr-Zn-MOF-2 (d) Zr-Zn-MOF-3

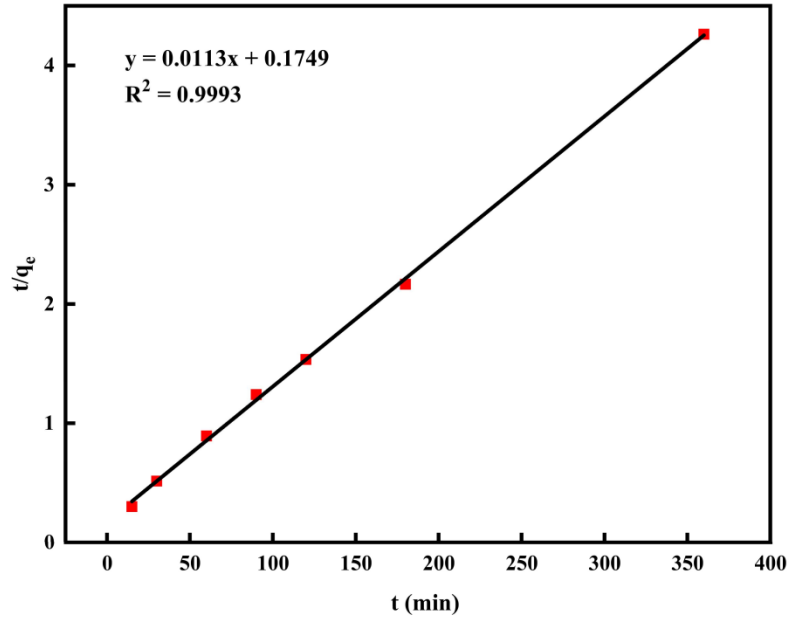

(a)

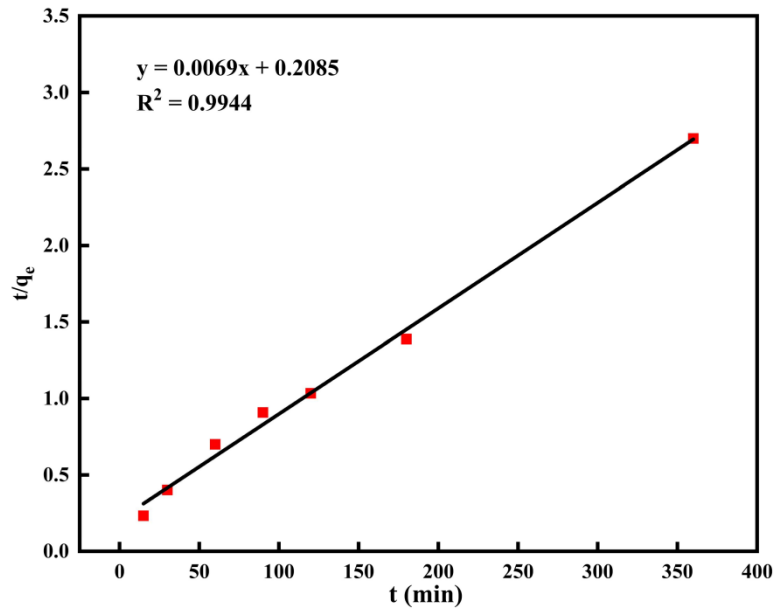

(b)

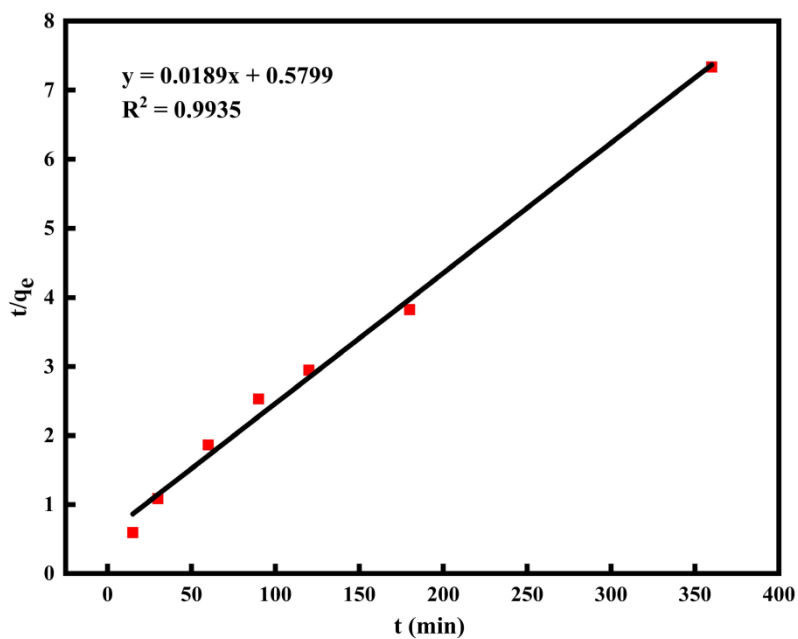

(c)

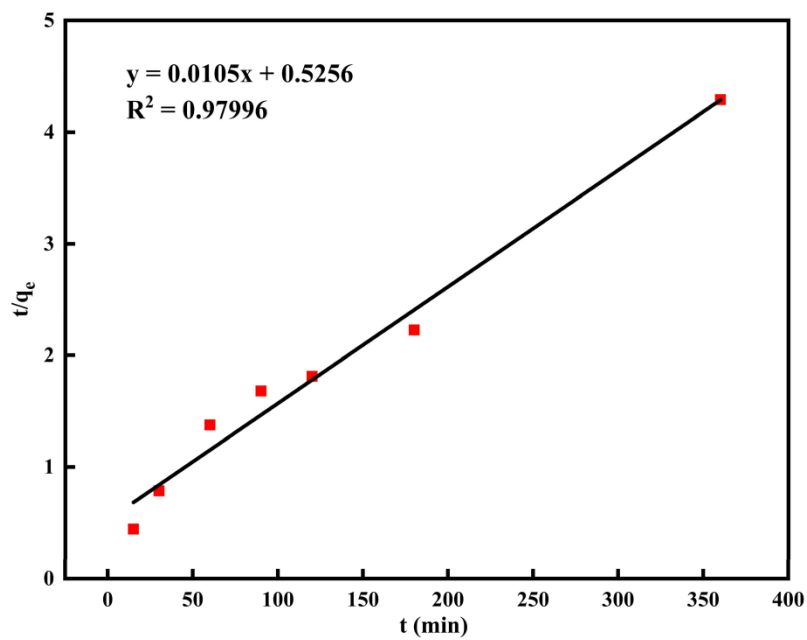

(d)

**Fig. S17** Linear plots for pseudo-second order kinetics for the adsorption of palladium (II) on different MOFs (a) UiO-66-NH<sub>2</sub> (b) Zr-Zn-MOF-1 (c) Zr-Zn-MOF-2 (d) Zr-Zn-MOF-3

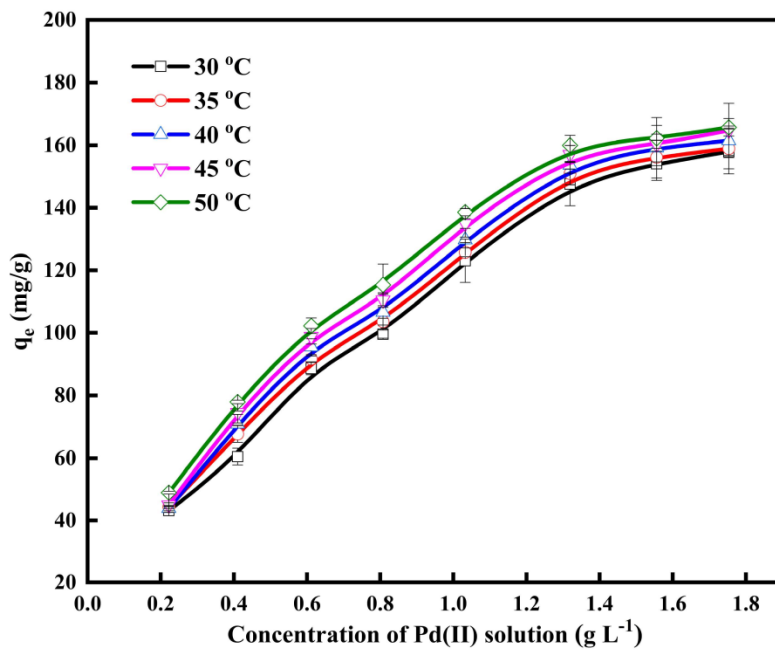

(a)

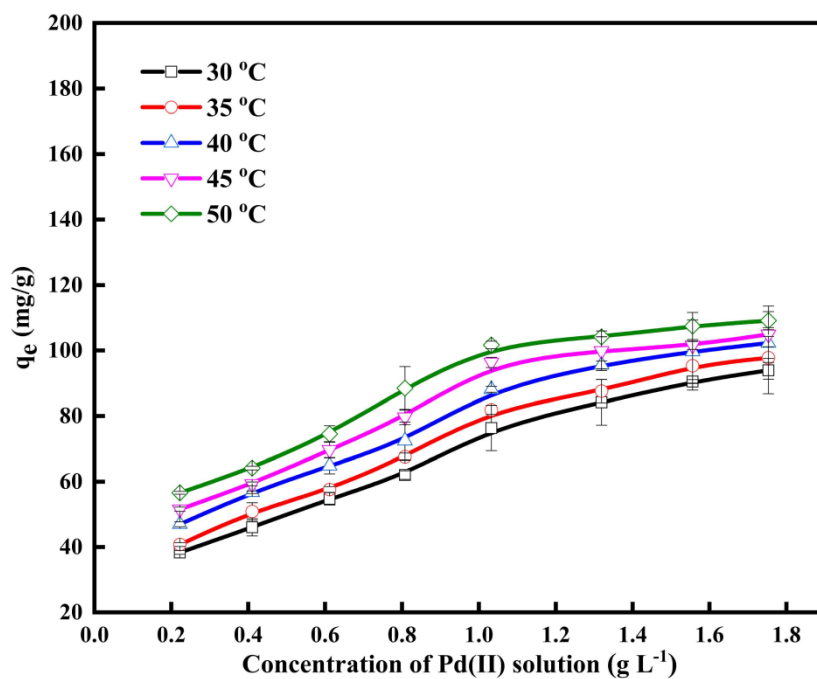

(b)

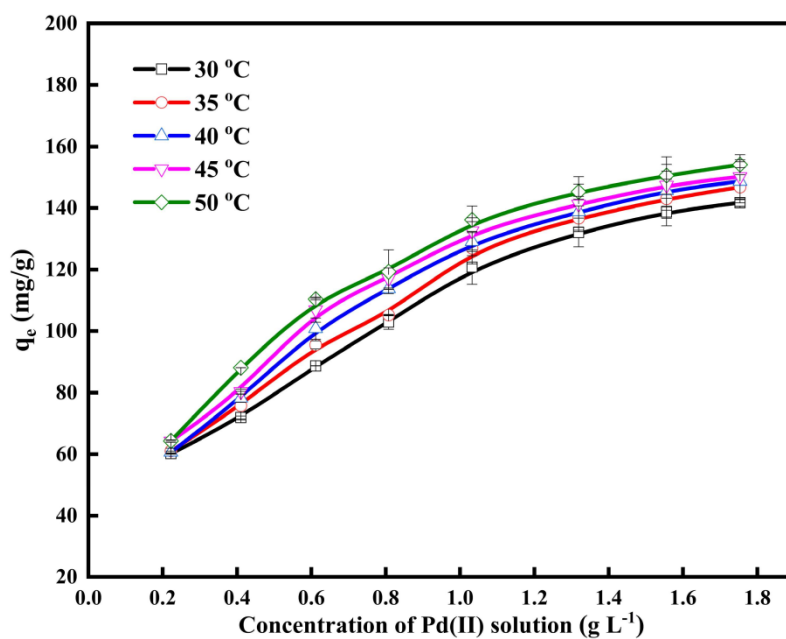

(c)

**Fig. S18** Effect of palladium(II) concentration and temperature on the adsorption by (a) UiO-66-NH<sub>2</sub> (b) Zr-Zn-MOF-2 (c) Zr-Zn-MOF-3



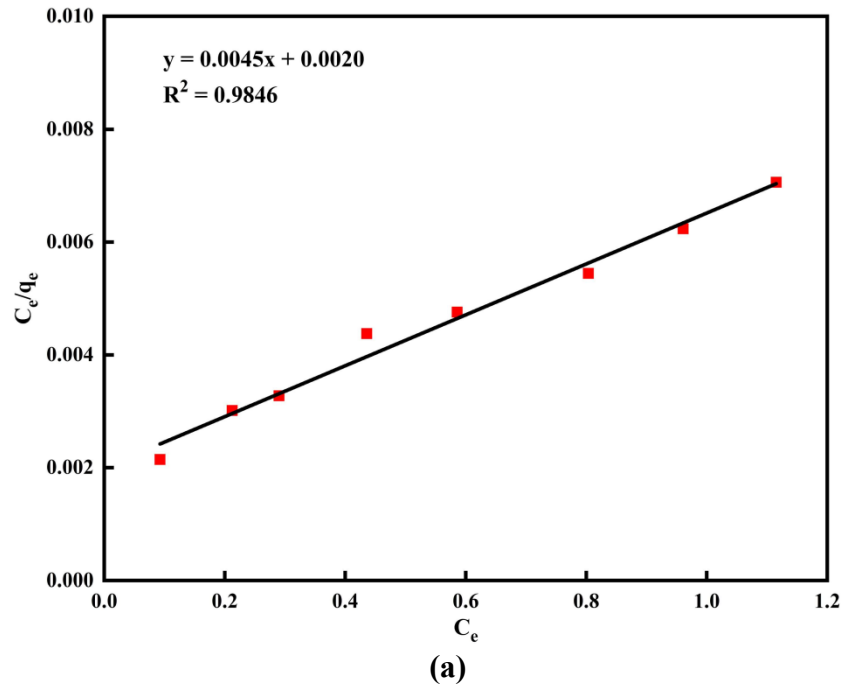

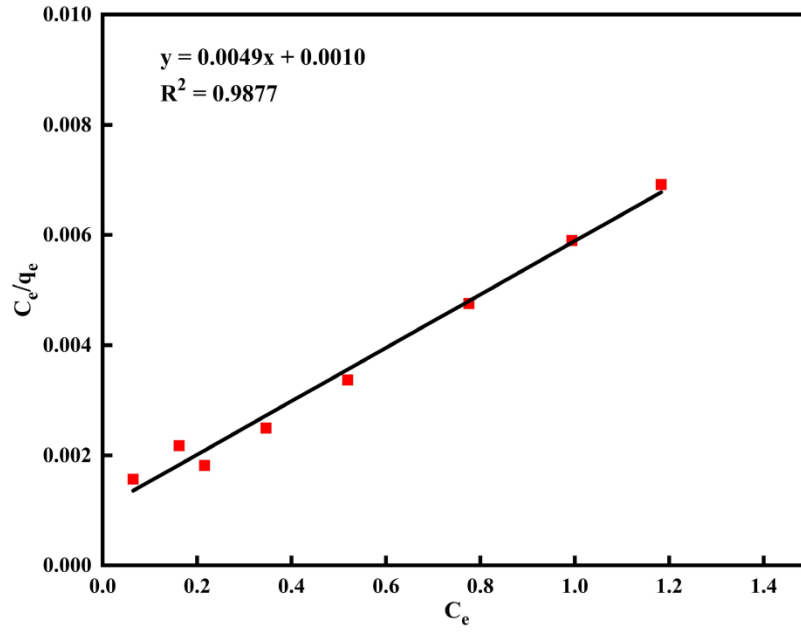

(b)

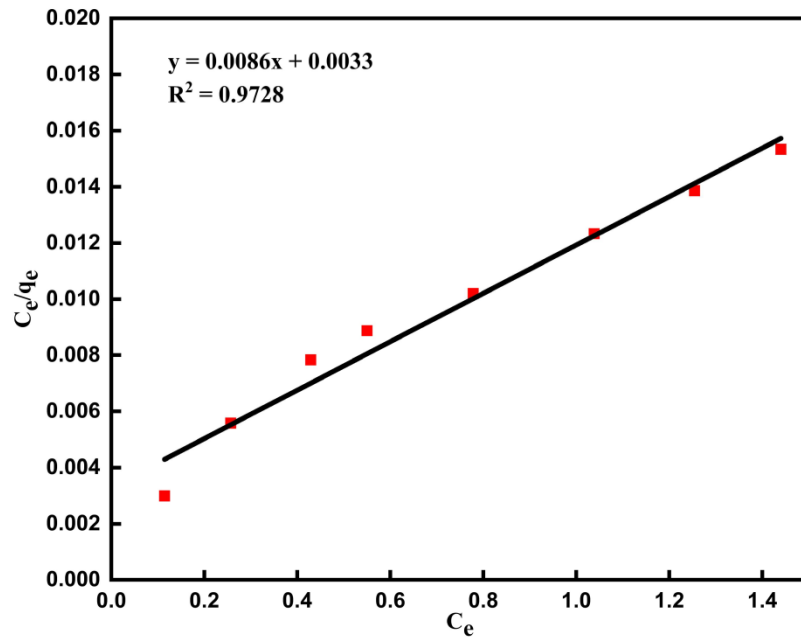

(c)

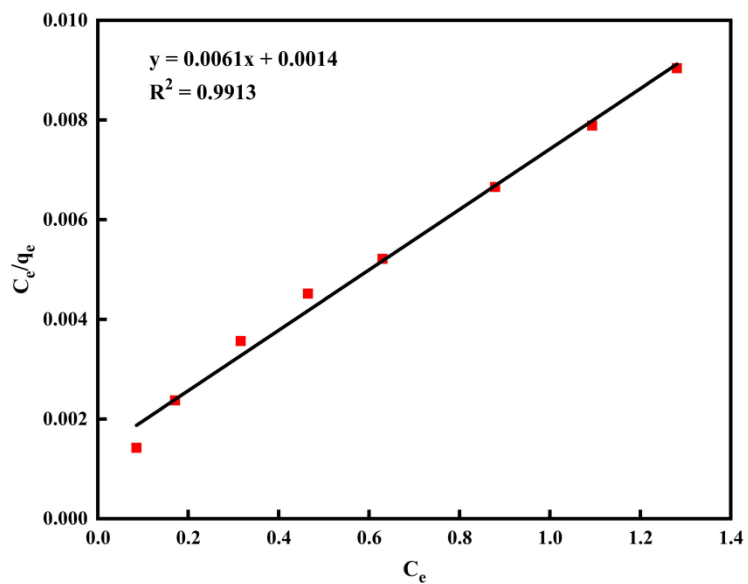

(d)

**Fig S19.** Linear Langmuir isotherm for the adsorption of palladium(II) on different MOFs

(a) UiO-66-NH<sub>2</sub> (b) Zr-Zn-MOF-1 (c) Zr-Zn-MOF-2 (d) Zr-Zn-MOF-3

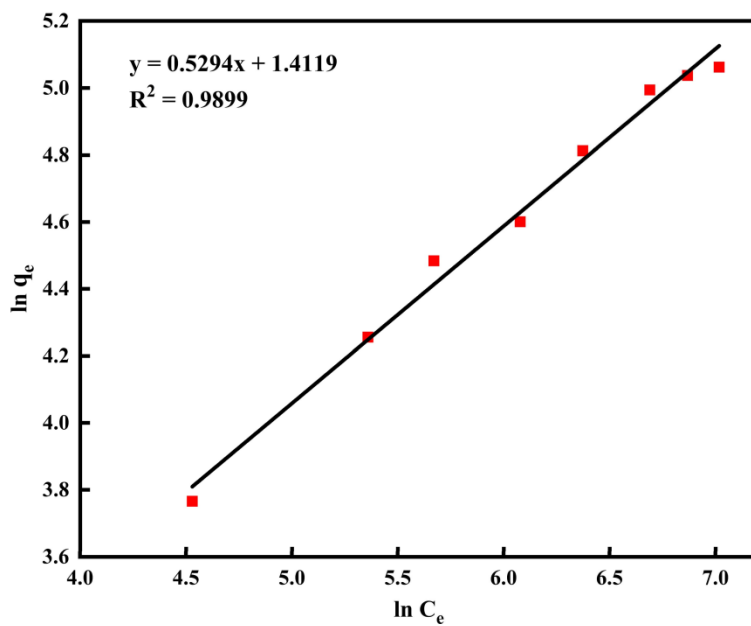

(a)

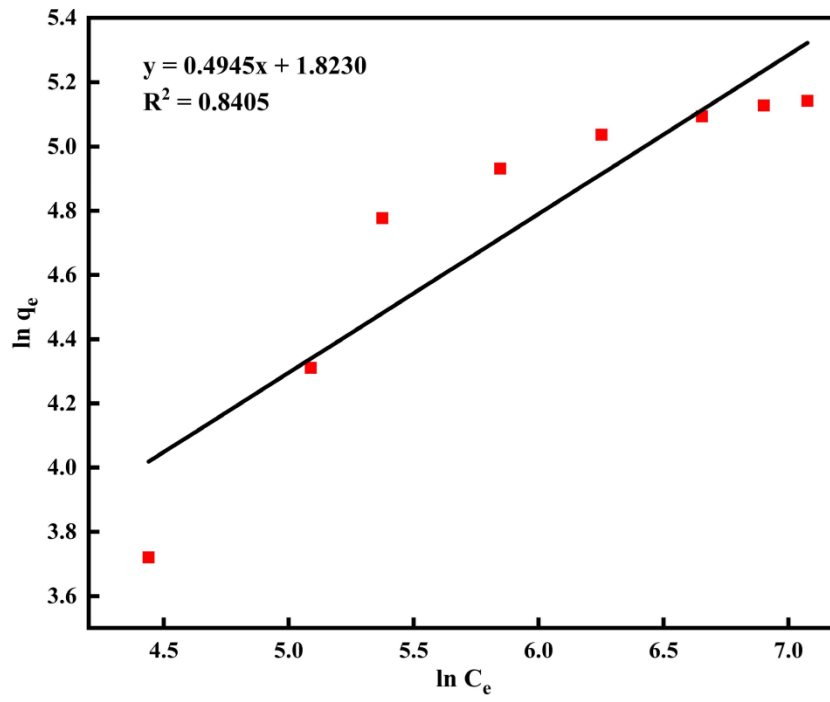

(b)

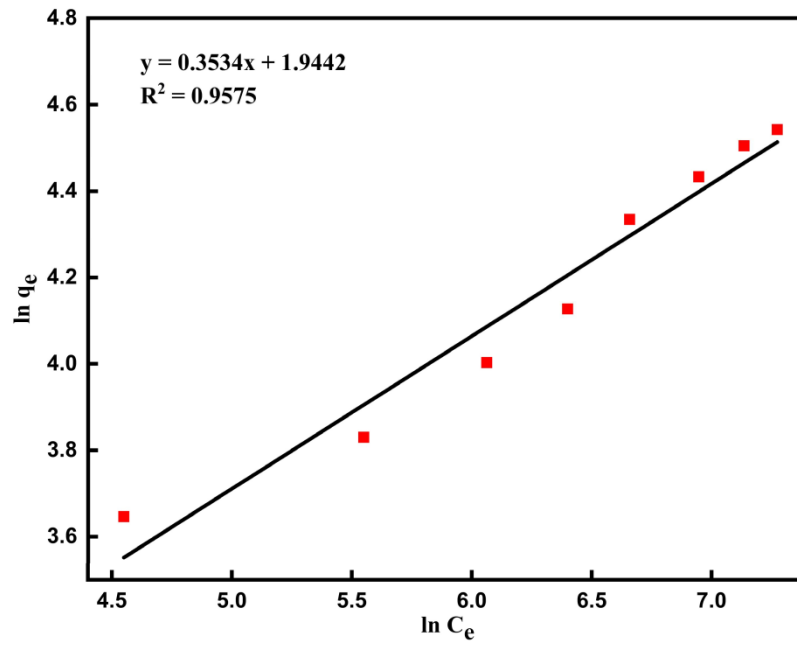

(c)

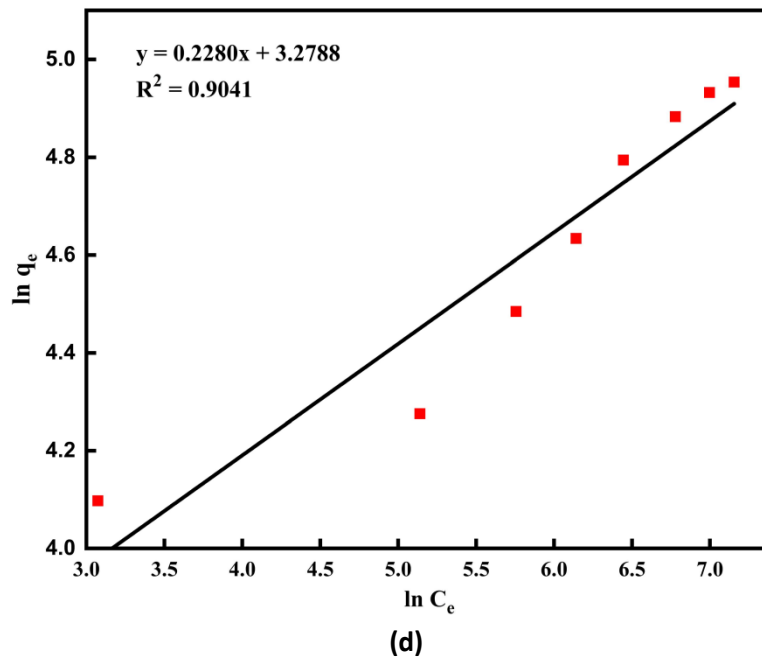

**Fig S20.** Linear Freundlich isotherm for the adsorption of palladium(II) on different MOFs  
 (a) UiO-66-NH<sub>2</sub> (b) Zr-Zn-MOF-1 (c) Zr-Zn-MOF-2 (d) Zr-Zn-MOF-3

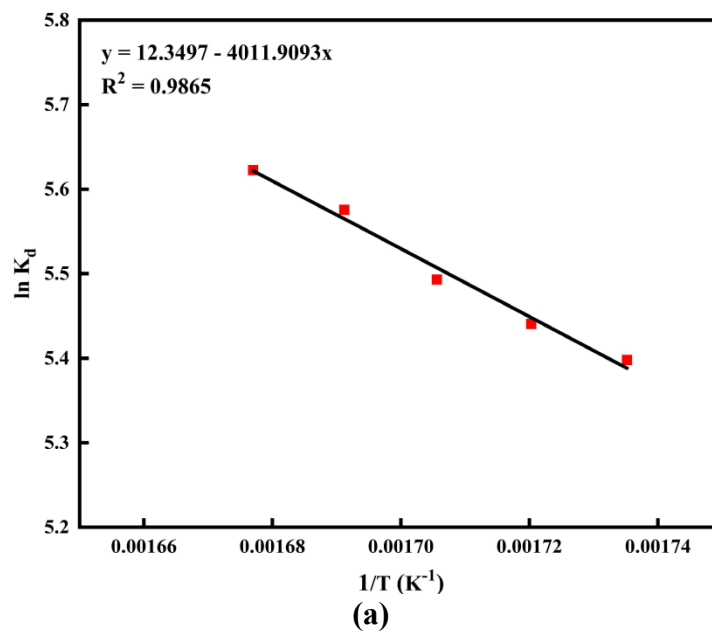

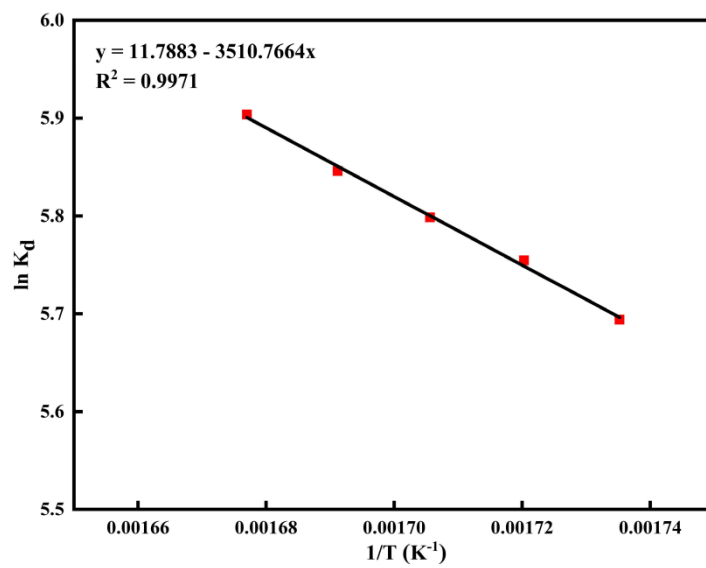

(b)

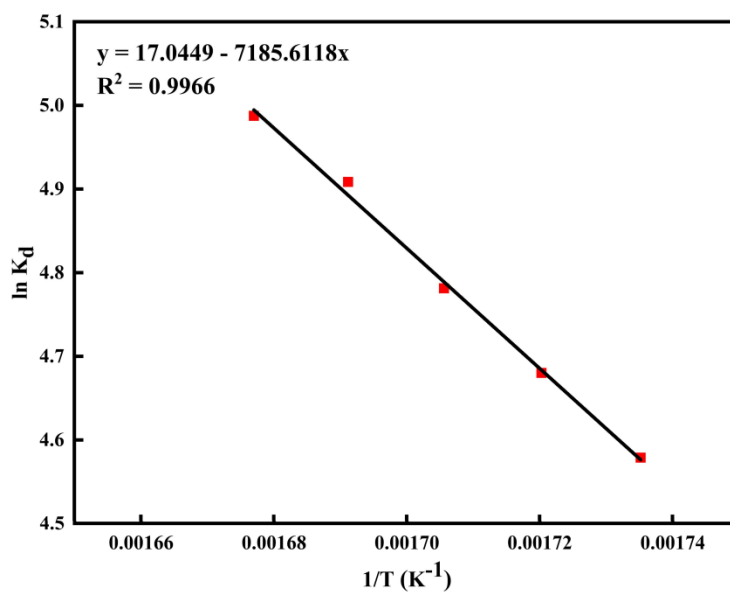

(c)

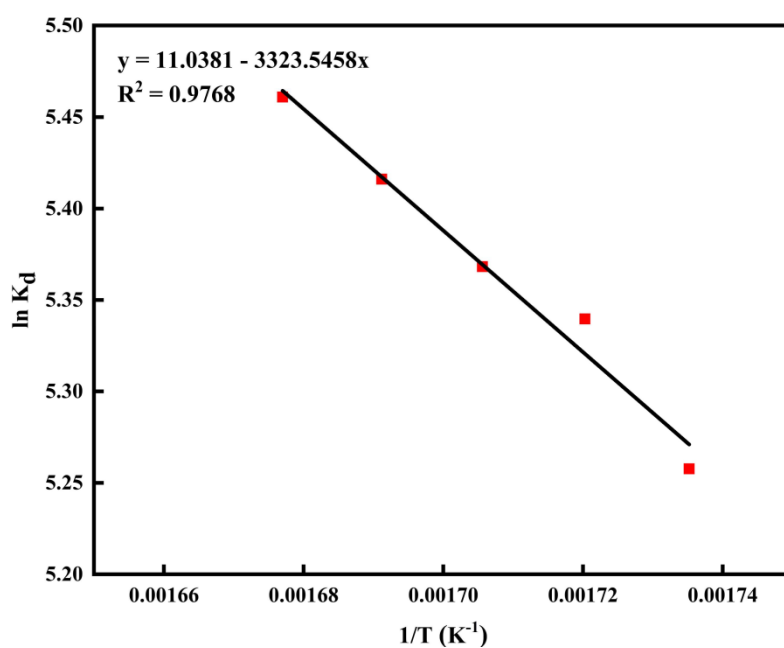

(d)

**Fig. S21**  $\ln K_d$  versus  $1/T$  (a) UiO-66-NH<sub>2</sub> (b) Zr-Zn-MOF-1 (c) Zr-Zn-MOF-2 (d) Zr-Zn-MOF-3

## References:

1. S. P. Sangal and A. K. Dey, Microdetermination of palladium (II) using 1-(o- arsonophenylazo)-2-naphthol-3, 6-disulfonate (thoron) as a colorimetric reagent, *Microchemical Journal*, 1963, 7, 257-262.
